# Supplementary material for: Refinement of 1p36 Alterations Not Involving PRDM16 in Myeloid and Lymphoid Malignancies
Source: PLoS One. 2011 Oct 21;6(10):e26311. doi: 10.1371/journal.pone.0026311 (PMC3198844; doi:10.1371/journal.pone.0026311)
Supplement: Table S2 — Balanced translocations. (XLS) [file pone.0026311.s002.xls]

## Sheet: Feuil1
Patient number			015	053	092	050	105	141		008		068	100	014	024	097	017	121	149	018	061	047	006	043	111	118	137	016	051	072	073
Diagnosis			CLL	Burkitt's-like	AML	PV	ALL L1	MDS		AML		MDS	ALL	CLL	MDS	MDS	CLL	TCL	MF	ALL	AML	AML	AML	AML	AML	MDS	AML	CML	MZL	AML	MDS post PV
Studied 1p36 abnormality			t(1;4)	add(1)(p36)	add(1)(p36)	t(1;9)	der(1)t(1;1)	t(1;1)	t(1;13)	t(1;2)	t(1;6)	inv(1)(p21p36)	add(1)(p36)	t(1;13)	der(1)	t(1;7)	t(1;17)	t(1;11)	t(1;12)	t(1;7)	t(1;9;22)	der(1)t(1;1)	add(1)(p36)	t(1;8;6)	t(1;17)	t(1;21)	add(1)(p36)	t(1;7)	t(1;13)	dup(1)(p)	?dic(1;17)
Probe	Locations	Range
T1p	1pter	0-1 Mb	der(4)
RP11-620F19	1p36.33																														other #
RP11-425E15	1p36.33	1-2 Mb	der(4)		other #					der(2)	der(6)	terminal 1p																		term 1p only	other #
RP5-890O3	1p36.33		der(4)
RP1-283E3	1p36.33		der(4)		other #
G248P8962B4	1p36.33		der(4)
G248P84280G9	1p36.33	2-3 Mb	der(4)
G248P85743D3	1p36.33		der(1)
G248P88388E7	1p36.33		der(1)
RP11-181G12	1p36.33		der(1)	der(14)	other #	der(9)	other #	short der(1)	der(13)				other small #	der(13)	der(5)	der(7)	der(17)	der(11)	der(12)	der(7)	der(9)	other #		der(8)	der(17)	der(21)	other #	der(7)	der(13)
RP11-799N13	1p36.33-1p36.32			der(14)	other #
RP3-395M20	1p36.32			der(1)	split
RP11-740P5	1p36.32			der(1)	der(1)								other small #
RP5-907A6	1p36.32			der(1)									other small #										mar3
RP1-163G9	1p36.32	3-4 Mb			der(1)								other small #
RP11-22L13	1p36.32		der(1)		der(1)	der(9)	other #	short der(1)	der(13)	der(2)	der(6)	terminal 1p	other small #	der(13)	der(5)	der(7)	der(17)		der(12)	der(7)	der(9)	other #	mar3	der(8)	der(17)	der(21)	other #	der(7)	der(13)	term 1p only	other #
RP1-187A9	1p36.32			der(1)		der(9)	other #	short der(1)	der(13)
G248P82582G10	1p36.32					der(9)
G248P80979E6	1p36.32					der(9)
RP11-46F15	1p36.32					der(9)	other #	short der(1)	der(13)	der(2)	der(6)		other small #						der(12)
RP5-1092A11	1p36.32					der(1)	der(1)	split	split	split		terminal 1p																		term 1p only
RP11-718D19	1p36.32	4-5 Mb				der(1)	der(1)
RP11-111O5	1p36.32					der(1)		2x long der(1)	der(1)
RP1-37J18	1p36.32						der(1)					terminal 1p
RP11-58I24	1p36.32											terminal 1p
RP5-1096P7	1p36.32			der(1)		der(1)							other small #
RP11-49J3	1p36.31	5-6 Mb					der(1)	2x long der(1)	der(1)				deleted	der(13)	der(5)		der(17)			der(7)								der(7)		term 1p only
RP11-372C15	1p36.31	6-7 Mb		der(1)		der(1)										der(7)						other #							der(13)
RP1-202O8	1p36.31											terminal 1p	deleted
RP11-58A11	1p36.31												der(1)				der(17)
RP11-780G9	1p36.31									der(1)		split	der(1)	der(13)
RP11-845I16	1p36.31 - 1p36.23	7-8 Mb										inverted 1p	der(1)
RP3-438L4	1p36.31- p36.23																der(17)
RP3-467L1	1p36.23							2x long der(1)	der(1)			inverted 1p					der(17)													term 1p only
RP11-902J21	1p36.23	8-9 Mb																												split
RP11-748N23	1p36.23												der(1)																	cen & term 1p
RP5-1115A15	1p36.23											inverted 1p	der(1)	der(13)			der(17)
RP4-633I8	1p36.23									der(1)	der(6)			der(1)					der(12)
RP3-477M7	1p36.23													der(1)			der(17)													cen & term 1p
RP5-963K15	1p36.23	9-10 Mb																					mar3
G248P85544C5	1p36.23														der(5)
RP11-315O13	1p36.23													der(1)	der(5)		deleted			der(7)	der(9)		mar3	der(8)				der(7)
RP3-510D11	1p36.23-1p36.22			der(1)		der(1)	der(1)	2x long der(1)	der(1)			inverted 1p	der(1)		der(1)	der(7)	deleted	der(11)			der(9)	other #	mar3				other #		der(13)	cen & term 1p	other #
RP13-392I16	1p36.22															der(7)
RP11-558F24	1p36.22															der(7)															other #
RP11-892D18	1p36.22															der(7)	deleted		der(12)
RP11-177N11	1p36.22	10-11 Mb														split	deleted			der(7)
RP11-420G9	1p36.22															deleted	deleted
RP11-108G8	1p36.22															der(1)	der(1)
RP11-874A11	1p36.22	11-12 Mb													der(1)	der(1)	der(1)	der(11)					mar3	der(8)							other #
G248P81477A2	1p36.22																					other #	mar3
RP1-69M21	1p36.21			der(1)											der(1)						der(9)	other #	mar3
G248P89403H11	1p36.22																					other #	mar3
RP11-56N19	1p36.22																	der(11)	der(12)												deleted
RP11-929P4	1p36.22 - 1p36.21	12-13 Mb																der(1)	der(1)	der(7)											deleted
RP11-219C24	1p36.21	13-14 Mb														der(1)		der(1)		der(7)	der(9)	other #
		14-15 Mb
RP3-467K16	1p36.21	15-16 Mb						2x long der(1)	der(1)							der(1)		der(1)		der(7)	der(9)	other #			der(17)	der(21)	other #				deleted
RP11-5P18	1p36.13	16-17 Mb																		der(7)	der(9)	other #	mar3
RP11-91D22	1p36.13	17-18 Mb																		der(1)	der(9)	other #	mar3
RP11-99C7	1p36.13																				split	other #	mar3						der(13)
RP11-261J13	1p36.13																				der(1)	split	deleted
RP11-79D15	1p36.13	18-19 Mb													der(1)							der(1)	deleted				other #
RP3-394P21	1p36.13																		der(1)	der(1)	der(1)	der(1)	der(1)	der(8)	der(17)
RP4-657E11	1p36.13	19-20 Mb										inverted 1p											der(1)	der(8)						cen & term 1p	deleted
RP11-91K11	1p36.13	20-21 Mb													der(1)									der(8)				der(7)
RP11-1058B2	1p36.12																							der(8)	der(17)
RP11-367G13	1p36.12																							split
RP11-668L19	1p36.12	21-22 Mb																		der(1)				der(1)
RP11-780O13	1p36.12																							der(1)
RP11-487E1	1p36.12																			der(1)				der(1)	der(17)		other #		der(13)
RP11-132G19	1p36.12	22-23 Mb																						der(1)	deleted
RP1-150O5	1p36.12	23-24 Mb																							deleted
RP11-223J15	1p36.12														der(1)						der(1)		der(1)	der(1)	deleted			der(7)
RP11-89K16	1p36.11	24-25 Mb																							deleted		other #
RP11-10N16	1p36.11																								der(1) 2x
RP11-51C6	1p36.11																								der(1) 2x				der(13)
RP11-2N13	1p36.11	25-26 Mb																							der(1) 2x				der(13)
RP3-465N24	1p36.11															der(1)		der(1)							der(1) 2x	der(21)		der(7)	der(13)
RP11-492M19	1p36.11	26-27 Mb																								der(1)	other #	der(7)	deleted
RP11-696E2	1p36.11	27-28 Mb																								der(1)	der(1)
RP11-285H13	1p36.11																									der(1)	der(1)		deleted
RP4-633N17	1p36.11																			der(1)	der(1)					der(1)	der(1)	der(7)			deleted
RP11-4K3	1p36.11																									der(1)	der(1)	der(7)
RP1-144C9	1p36.11																									der(1)	der(1)				deleted
RP1-159A19	1p36.1-35.3							2x long der(1)																		der(1)		deleted	deleted
RP11-288L9	1p35.3																									der(1)		der(1)	deleted
RP11-261P19	1p35.3																											der(1)			deleted
RP11-442N24	1p35.3																					der(1)						der(1)	der(1)
RP3-437I16	1p35.3							2x long der(1)																							deleted
RP3-357I16	1p35.2																														deleted
RP11-266K22	1p35.2																														deleted
RP4-811H24	1p35.1							2x long der(1)																		der(1)					cen & term 1p
RP11-104P21	1p35.1							on 1p- and 1p+
RP5-947L8	1p35.1																														cen & term 1p
RP4-651I17	1p34.3							on 1p- and 1p+
RP11-244H3	1p34.3							on 1p- and 1p+																							cen & term 1p
RP4-765A10	1p34.3							on 1p- and 1p+																				der(1)
RP5-882O7	1p34.1																							der(1)
RP11-567C20	1p33-p32.3							on 1p- and 1p+
RP11-1059F24	1p31.1											inverted 1p
RP11-163M2	1p22.1											centromeric 1p
RP11-465K1	1p21.3											centromeric 1p
RP11-163I3	1p21.1											centromeric 1p
Each column represents a case, each line represents a BAC or fosmid probe. 1 Mb intervals on 1p36 are represented at the same size. Diagnoses are highlighted in gold in myeloid cases and in light yellow in lymphoid cases. The results of the used BAC probes are represented in unshadowed boxes, inferences are represented in shadowed boxes. Cells are painted green if the probe hybridizes to the der(…
